# Supplementary material for: Functional and comparative genomics analyses of pmp22 in medaka fish
Source: PubMed Central journal article supplement (PMC2714311; doi:10.1186/1471-2202-10-60), 2009-06-17

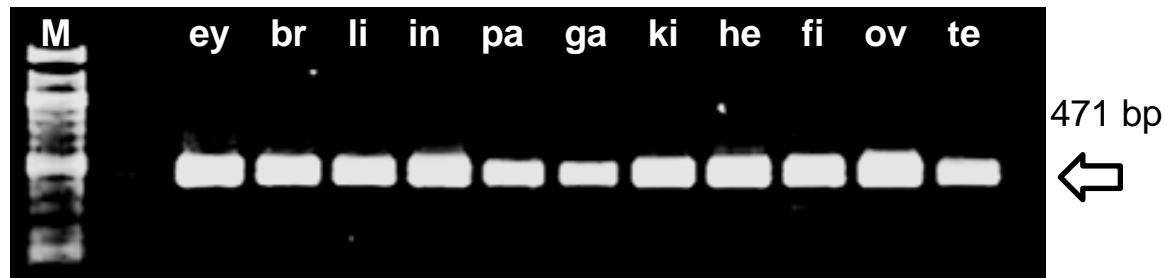

Supplement: 1471-2202-10-60-S1.pdf [file 1471-2202-10-60-S1.pdf]
