# Supplementary material for: Functional and comparative genomics analyses of pmp22 in medaka fish
Source: PubMed Central journal article supplement (PMC2714311; doi:10.1186/1471-2202-10-60), 2009-06-17
Supplement: 1471-2202-10-60-S4.pdf [file 1471-2202-10-60-S4.pdf]

Threshold cycle of quantitative RT-PCR of *beta-actin* and *ol\_pmp22* mRNA

|        | <i>beta-actin</i> *<br>(average Ct) | total <i>ol_pm22</i><br>(average Ct) | total <i>ol_pmp22</i> –<br><i>beta-actin</i> (Ct) | 1A <i>ol_pm22</i><br>(average Ct) | 1A <i>ol_pmp22</i> –<br><i>beta-actin</i> (Ct) | 1B <i>ol_pm22</i><br>(average Ct) | 1B <i>ol_pmp22</i> –<br><i>beta-actin</i> (Ct) |
|--------|-------------------------------------|--------------------------------------|---------------------------------------------------|-----------------------------------|------------------------------------------------|-----------------------------------|------------------------------------------------|
| 4 dpf  | 18.036                              | 24.628                               | 6.592                                             | 29.811                            | 11.775                                         | 25.332                            | 7.296                                          |
| 6 dpf  | 19.265                              | 24.149                               | 4.884                                             | 29.473                            | 10.208                                         | 24.603                            | 5.338                                          |
| 8 dpf  | 19.510                              | 23.989                               | 4.479                                             | 25.029                            | 5.519                                          | 24.005                            | 4.494                                          |
| 14 dpf | 19.843                              | 25.365                               | 5.522                                             | 29.857                            | 10.014                                         | 25.265                            | 5.422                                          |
| 30 dpf | 18.740                              | 24.410                               | 5.670                                             | 26.853                            | 8.113                                          | 25.125                            | 6.385                                          |

Ct: Threshold cycle

\* internal control

Relative quantification of total, 1A and 1B mRNA levels

|        | total relative<br>quantification* |                      |       | 1A relative<br>quantification* |                   |        | 1B relative<br>quantification* |                   |       |
|--------|-----------------------------------|----------------------|-------|--------------------------------|-------------------|--------|--------------------------------|-------------------|-------|
|        | total Min.**<br>(Ct)              | total Max.**<br>(Ct) |       | 1A Min.**<br>(Ct)              | 1A Max.**<br>(Ct) |        | 1B Min.**<br>(Ct)              | 1B Max.**<br>(Ct) |       |
| 4 dpf  | 1.000                             | 0.693                | 1.443 | 1.000                          | 0.630             | 0.044  | 1.000                          | 0.415             | 2.411 |
| 6 dpf  | 3.269                             | 2.492                | 4.289 | 2.965                          | 2.065             | 4.266  | 3.888                          | 2.981             | 5.070 |
| 8 dpf  | 4.326                             | 3.967                | 4.717 | 76.479                         | 66.873            | 87.465 | 6.974                          | 6.369             | 7.604 |
| 14 dpf | 2.099                             | 1.379                | 3.197 | 3.389                          | 1.817             | 6.321  | 3.665                          | 2.819             | 4.766 |
| 30 dpf | 1.894                             | 1.547                | 2.321 | 12.667                         | 11.276            | 14.230 | 1.881                          | 1.736             | 2.039 |

Ct: Threshold cycle

\* relative quantification was calculated by dividing each level by corresponding 4 dpf level.

\*\* Min. and Max. were estimated according to the manufacturer's instructions of Applied Biosystems.
